# Supplementary material for: Coxiella burnetii Nine Mile phase I primary infection derived protective immunity against C. burnetii reinfection in mice depends on both B and T cells, but T cells play a critical role
Source: Frontiers journal article supplement (doi:10.3389/fimmu.2024.1427822), 2024-10-14
Supplement: Data_Sheet_1.PDF [file Data_Sheet_1.PDF]

## Flow cytometry analysis gating strategy for figure 2

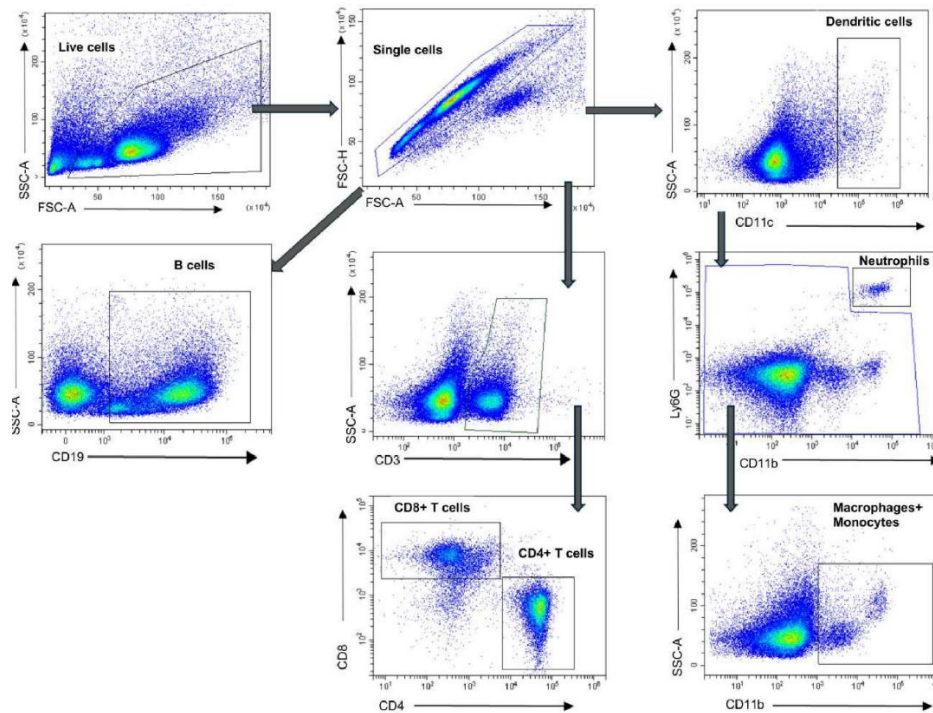

Figure S1: Representative flow cytometry gating strategy for figure 2. Live cells were identified based on forward scatter (FSC) and side scatter (SSC) properties. Single cells were then gated using FSC-Height (FSC-H) vs FSC-Area (FSC-A) to exclude doublets. From the single cell population, various immune cell subsets were identified sequentially: dendritic cells (CD11c<sup>+</sup>), B cells (CD19<sup>+</sup>), and T cells (CD3<sup>+</sup>), further subdivided into CD8<sup>+</sup> and CD4<sup>+</sup> T cells. From the non-dendritic cell population, neutrophils were identified (CD11b<sup>+</sup> Ly6G<sup>+</sup>). The remaining non-neutrophil cells were then gated for CD11b<sup>+</sup> cells to identify macrophages and monocytes. Plots show representative data with sequential gating hierarchy indicated by arrows. FSC: Forward Scatter; SSC: Side Scatter; A: Area; H: Height.
